# Supplementary material
Source: HighWire-hosted journal article supplement (doi:10.1101/rna.079692.123)
Supplement: Supplemental_Legends.docx [file Supplemental_Legends.docx]

**Supplemental Figure 1. Rae1 acts independently of AbrB on *bmr* operon expression and cleaves the readthrough transcript in the intergenic region between *bmrB* and *bmrC.*** (A) Northern blot showing expression of the *bmr* and *abrB* transcripts in WT, *∆abrB,* *∆rae1* and *∆rae1 ∆abrB* strains at mid-log (OD600 = 0.5) or stationary phase (OD600 = 3). Blots were probed in a sequential order with oligo CC2344 (*bmrC*), oligo CC2145 (*abrB*) and finally with a probe complementary to 16S rRNA (CC058) as a loading control.(B)Northern blot of total RNA isolated from WT and *∆rae1* strains probed with a riboprobe for *bmrB* (left) and with oligo CC2344 for *bmrC* (right). RNA was isolated in stationary phase (OD600 = 3). 16S rRNA (CC058) was probed as a loading control.(C) Structure of the p*Pspac-bmrBC,* p*Pspac-hp-bmrC* and p*Pspac-bmrC* plasmids. ORFs are represented by grey boxes, the promoter by a rightward-pointing arrow and the transcription terminator by a hairpin structure. Co-ordinates are given relative to the AUG start codon of *bmrC.* (D) Northern blot showing expression of the plasmid-derived transcripts in WT and *∆rae1* strains containing either the p*Pspac-bmrBC,* p*Pspac-hp-bmrC* or p*Pspac-bmrC* plasmid at mid-log phase (OD600 = 0.5). The lower amounts of RNA transcribed from the p*Pspac-hp-bmrC* construct are likely to be due to an inhibitory effect of a hairpin structure close to the transcription start site. Blots were probed with oligo CC2344 (*bmrC)* (black bar in panel C) and then with a probe complementary to 16S rRNA (CC058) as a loading control.

**Supplemental Fig. 2. Ribosome binding to the predicted GUG start codon of *bmrX* and conservation of the BmrX peptide in Bacilli.** (A) Ribosome occupancy profiles on the *bmrBCD* polycistronic mRNAs from Li *et al*. 2012. The location of *bmrX* is indicated by a green arrow. Zoom on the *bmrX* sequence*.* The predicted GUG start codon and UGA stop codon of *bmrX* are boxed in green and red, respectively. The stop codon of *bmrB* and the start codon of *bmrC* are indicated as red and green bars. The Rae1 site mapped within *bmrX* is showed by a red arrow. (B) Conservation of the BmrX amino acid sequence in Bacilli. The sizes of the peptide encoded are indicated. (*), (:) and (.) indicate identical amino acid residues, conserved substitution, and semi-conserved substitutions respectively.

**Supplemental Fig. 3. The *bmrX* ORF contains a *bona fide* and transportable Rae1 cleavage site**. (A) Schematic of the two primary *hbs∆* transcripts (P3-ter and P1-ter) and of the ribosome protected species (R-ter; 339 nts). The *hbs∆* sequence is in blue, the 5’ -UTR and 3’-UTR of S1025 in red and the *bmrX* ORF in grey. Rae1 is depicted as a scissors symbol. The position of the probe used is indicated by a black bar. (B) Northern blot analysis of WT and *Δrae1* strains harboring the *hbsΔ-bmrX* construct in the *amyE* locus at times after rifampicin addition. The blot was probed with an oligo complementary to the *bmrX* ORF (CC2194; black bar in panel A). The origin of the 3 transcripts is shown to the right of the autoradiogram. Blots were rehybridised with a probe complementary to 5S rRNA (HP246) as a loading control. (C) Schematic of the *S1025* and *bmrX* constructs expressed from a constitutive *Pspac* promoter lacking the *lac* operator (*Pspac* *(con)*). Northern blot analysis of WT and *Δrae1* strains containing the P*spac-S1025* or the P*spac-bmrX* plasmid probed with oligo CC2799 (*S1025*) orCC2194 (*bmrX)* and then with a probe complementary to 5S (HP246) or 16S rRNA (CC058) as a loading control.

**Supplemental Fig. 4. RNA decay plots of wild-type and mutant derivatives of *bmrXCD* mRNAs**. WT strains are shown by black dots and *Δrae1* strains by grey dots. The slopes of the curves used for half-life calculations are given for each plot.

**Supplemental Fig. 5. MutS2 and Rae1 act in independent pathways**. Northern blot analysis of WT, *Δrae1, ΔmutS2* and *Δrae1ΔmutS2* at times after rifampicin addition. The blot was probed in a sequential order: oligo CC2344 (*bmrC*), oligo CC1589 (*yrzI*) and then with a probe complementary to 16S rRNA (CC058) as a loading control. For *yrzI*, the correspondence between bands and transcripts is given to the right of the blot: the P1-T4 and the P3-T4 correspond to primary transcripts from the P1 and P3 promoters to the main operon terminator (T4). R-T4 refers to the 521-nt species extending from 21 nt upstream of the *yrzI* coding sequence to the T4 terminator (Leroy et al. 2017).
