# Supplementary material
Source: HighWire-hosted journal article supplement (doi:10.1101/rna.079692.123)
Supplement: Supplemental_Table_S1.docx [file Supplemental_Table_S1.docx]

**Table S1.** Oligonucleotides used in this study.

| Oligo | Gene | Sequence |
| --- | --- | --- |
| HP246 | 5S | ATCGGCGCTGAAGAGCTTAACTTCC |
| CC058 | 16S | CTTCGTAGGGCAAATCGCCGTCCCC |
| CC429 | *hbs* | GTAAGCTAGATGCATACACGATCTATATTCAC |
| CC572 | *hbs* | AAGCAAAGGGATCCCCTGTCAGGAAGCCCATGCTC |
| CC1589 | *yrzI* | CTGCTGTTCTCGTTCGAATTCTTC |
| CC1607 | *hbs* | GGTGAATTCCCGAGCTGTAATACCGGTAGACCTC |
| CC2132 | *bmrB* | ATTtctagaATGATTGACAATAAAAGGTTTTGTTTATATGATG |
| CC2145 | *abrB* | GATTTCGCTGATGATTTGCTCAGCGCCTTC |
| CC2194 | *bmrX* | CACGACTGCCCTCGCCTCTGTATTTGTCTTCAC |
| CC2195 | *bmrB* | GGAGGGTTTGCTATGCCAAGGAATTTGC |
| CC2196 | *bmrB* | GCTCTAATACGACTCACTATAGGGTTACGCACAGCGCTTTTCAGCGCGCGG |
| CC2344 | *bmrC* | CGCAATCGTATAGCGCAGCCAGTACGCC |
| CC2419 | *bmrX* | TTTTTTCCTTGCAGCTTTTTTCATCCAGTTTGGCAC |
| CC2421 | *gfp* | ATgcatgcCCTGTCAGGAAGCCCATGCTCTTGAAATATG |
| CC2422 | *gfp* | caccttcaaacttgacttcagcacgtgtc |
| CC2451 | *bmrB* | ATTtctagaCATATCGGTTAAAAAAGGCATGGAGCTGAC |
| CC2452 | *bmrC* | ATTtctagaGGAAAGACAGGTGTatgGGATGTGAAGAC |
| CC2467 | *bmrX* | GCTTTTTTCATCCAGTTTCACGAACTGCCCTCGCC |
| CC2468 | *bmrX* | GGCGAGGGCAGTTCGTGAAACTGGATGAAAAAAGC |
| CC2521 | *brmX* | CTGGATGAAAAAAGCTGCAAGGAAAAAAaaaggagaagaacttttcactggagTTG |
| CC2522 | *brmX* | CTGGATGAAAAAAGCTGCAAGGAAAAAATAaaaggagaagaacttttcactggagTTG |
| CC2523 | *brmX* | CTGGATGAAAAAAGCTGCAAGGAAAAAATaaaggagaagaacttttcactggagTTG |
| CC2565 | *bmrX* | CGCCTCTGTATTTGTCTTCTATCCCATACACCTGTC |
| CC2566 | *bmrX* | GACAGGTGTATGGGATTAGAAGACAAATACAGAGGCG |
| CC2617 | *bmrB* | ATTTCTAGATGAAATCAGAATGGAAGGAGGGTTTGCTATG |
| CC2634 | *gfp* | ATTAAGCTTGAAGGGGGAATGGCATAtgagtaaaggagaagaacttttcactggag |
| CC2635 | *gfp* | TATAATGCATCAATAGTTCCATTCTAAGCATTTTGTATAGTTCATCCATGCCATGTGC |
| CC2636 | *S1025* | ATGCTTAGAATGGAACTATTGATGCATTATAC |
| CC2698 | *bmrX* | CGCCTCTGTATTTGTCTTCATATCCCATCCTCCTTTCTTTCCTTAG |
| CC2699 | *bmrX* | CTAAGGAAAGAAAGGAGGATGGGATATGAAGACAAATACAGAGGCG |
| CC2774 | *bmrx* | GTGCCAAACTGGATGAAAAAACGGCTGCAGGAAAAAATAGAAG |
| CC2775 | *bmrx* | CTTCTATTTTTTCCTGCAGCCGTTTTTTCATCCAGTTTGGCAC |
| CC2799 | *S1025* | AACTTGGTCCTTCTCCATTGTATAATGC |
| CC2875 | *bmrX* | CCTTGCAGCTTTTTTCATCCAGTTTGGCACGAACTGCCCTCGCCTCTGTATTTGTCTTCAC |
| CC2876 | *bmrX* | GTGAAGACAAATACAGAGGCGAGGGCAGTTCGTGCCAAACTGGATGAAAAAAGCTGCAAGG |
| CC2893 | *bmrX* | CGCCTCTGTATTTGTCTTCACATGCCATTCCCCCTTCAGTTTTTTTCG |
| CC2894 | *bmrX* | GGATGAAAAAAGCTGCAAGGAAAAAATAGAAGGCGGCTGACGAAATAGCTGTCAAGAAAATGCGCG |
| CC2962 | *S1025* | GGATCCGAAAAGCCCCTTAGAAAGGGGCTTTTCATTTCAATGACATTAGACTGCTAATAAAAGGAC |
|  |  |  |
