# Supplementary material
Source: HighWire-hosted journal article supplement (doi:10.1101/rna.079692.123)
Supplement: Supplemental_Table_S2.docx [file Supplemental_Table_S2.docx]

**Table S2.** Bacterial strains used in this study

| Strain | Genotype | Reference |
| --- | --- | --- |
| SSB1002 | W168 *trpC+* | Lab strain |
| CCB195 | W168 pDG148 | (Leroy et al. 2017) |
| CCB375 | W168 *rae1::pMUTIN ery* | (Leroy et al. 2017) |
| CCB434 | W168 *rnjA::spc* | (Figaro et al. 2013) |
| CCB609 | W168 *rae1::pMUTIN* *ery* pDG148 | (Leroy et al. 2017) |
| CCB666 | W168 *rae1::pMUTIN* *ery* p*Pspac-*Rae1 (pl660) | (Leroy et al. 2017) |
| CCB693 | W168 *rae1::pMUTIN* *ery* p*Pspac-*Rae1D7ND81N (pl664) | (Leroy et al. 2017) |
| CCB748 | W168 *rae1::pMUTIN ery rnjA::spc* | This study |
| CCB942 | W168 Pspac-ssrA(H6DD) ery | This study |
| CCB1058 | W168 *abrB::cm* | This study |
| CCB1059 | W168 *rae1::pMUTIN ery abrB::cm* | This study |
| CCB1233 | W168 p*Pspac-hp-bmrC* (pl828) | This study |
| CCB1234 | W168 p*Pspac-bmrC* (pl829) | This study |
| CCB1235 | W168 *rae1::pMUTIN* *ery* p*Pspac-hp-bmrC* (pl828) | This study |
| CCB1247 | W168 *rae1::pMUTIN* *ery* p*Pspac-bmrC* (pl829) | This study |
| CCB1274 | W168 p*Pspac-bmrBXgfp* f1 (pl844) | This study |
| CCB1276 | W168 p*Pspac-bmrBXgfp* f0 (pl845) | This study |
| CCB1278 | W168 p*Pspac-bmrBXgfp* f2 (pl846) | This study |
| CCB1298 | W168 p*Pspac-bmrBXUAGgfp* (pl858) | This study |
| CCB1343 | W168 p*Pspac-bmrBX(UAG)C* (pl866) | This study |
| CCB1344 | W168 *rae1::pMUTIN* *ery* p*Pspac-bmrBX(UAG)C* (pl866) | This study |
| CCB1345 | W168 pP*spac-bmrBX*C (pl867) | This study |
| CCB1346 | W168 *rae1::pMUTIN* *ery* p*Pspac-bmrBXC* (pl867) | This study |
| CCB1356 | W168 p*Pspac-bmrBX(∆2)C* (pl873) | This study |
| CCB1357 | W168 *rae1::pMUTIN* *ery* p*Pspac-bmrBX(∆2)C* (pl873) | This study |
| CCB1366 | W168 p*Pspac-bmrBX(SD+)C* (pl876) | This study |
| CCB1367 | W168 *rae1::pMUTIN* *ery* p*Pspac-bmrBX(SD+)C* (pl876) | This study |
| CCB1368 | W168 *amyE::pDRgfpS1025* (pl875) | This study |
| CCB1427 | W168 p*Pspac-bmrBX(FS+2)C* (pl841) | This study |
| CCB1428 | W168 *rae1::pMUTIN* *ery* p*Pspac-bmrBX(FS+2)C* (pl841) | This study |
| CCB1444 | W168 *ssrADD::Cm* *amyE::pDRgfpS1025* (pl875) | This study |
| CCB1447 | W168 *ssrADD::Cm* *amyE::pDRgfpS1025* (pl875) pDG148 | This study |
| CCB1448 | W168 *ssrADD::Cm* *amyE::pDRgfpS1025* (pl875) p*Pspac-*Rae1 (pl660) | This study |
| CCB1487 | W168 *amyE::pHM2-hbsΔ-bmrX* (pl908) | This study |
| CCB1489 | W168 *rae1::pMUTIN ery amyE::pHM2-hbsΔ-bmrX* (pl908) | This study |
| CCB1567 | W168 *amyE::pHM2-S1025* (pl925) | This study |
| CCB1568 | W168 *rae1::pMUTIN ery amyE::pHM2-S1025* (pl925) | This study |
| CCB1594 | W168 *amyE::pHM2-bmrX* (pl936) | This study |
| CCB1595 | W168 *rae1::pMUTIN ery amyE::pHM2-bmrX* (pl936) | This study |
| CCB1611 | W168 *mutS2::kan* | This study |
| CCB1612 | W168 *rae1::pMUTIN ery mutS2::kan* | This study |
